# Supplementary material for: Variable Short-Term Air Quality Impacts of New York City’s Congestion Pricing Policy
Source: Research Square preprint supplement (doi:10.21203/rs.3.rs-8158429/v1), 2025-12-15

**Supplementary Information for**

Variable Short-Term Air Quality Impacts of New York City’s Congestion Pricing Policy

Polina M. Goldberg1,2,3, Abhishek Anand1, Daniel M. Westervelt1

1 Lamont-Doherty Earth Observatory , Columbia University, Palisades, NY 10964, USA.

2 Department of Biological Sciences, Columbia University, New York, NY 10027, USA

3 Department of Computer Science, Columbia University, New York, NY 10027, USA.

Table 1: 2025 vs 2024 post-intervention season PM2.5 Mann-Whitney U test results

| **Monitoring Location** | **CRZ** | **U** | **p-value** |
| --- | --- | --- | --- |
| Manhattan Bridge | CRZ | 8393 | p < 0.001 |
| Williamsburg Bridge | 6697 | p < 0.001 |
| Broadway & 35th | 9993 | p < 0.001 |
| Queensboro Bridge | 8090 | 0.002 |
| Cross Bronx Expressway | Non-CRZ | 12619 | 0.004 |
| Queens College | 9730 | 0.068 |

Table 2: 2024-25 vs 2023-24 PM2.5 Difference-in-Differences Regression Results

| **Monitoring Location** | **Pre-CBDTP control** | **Post-CBDTP control** | **Pre-CBDTP Treatment** | **Post-CBDTP Treatment** | **DiD** | **p-value** |
| --- | --- | --- | --- | --- | --- | --- |
| Manhattan Bridge | 12.38 | 11.43 | 9.06 | 7.77 | -0.34 | 0.667 |
| Williamsburg Bridge | 18.77 | 12.58 | 7.20 | 7.30 | 6.30 | p < 0.001 |
| Broadway & 35th | 13.09 | 9.71 | 8.07 | 7.16 | 2.46 | p < 0.001 |
| Queensboro Bridge | 11.16 | 19.38 | 7.66 | 6.80 | -9.08 | p < 0.001 |
| Cross Bronx Expressway | 12.20 | 9.32 | 7.44 | 8.30 | 3.74 | p < 0.001 |
| Queens College | 9.13 | 9.18 | 7.26 | 6.31 | -1.01 | 0.114 |

Table 3: Real-time PM2.5 Monitoring Locations

| **Monitoring Location** | **Latitude** | **Longitude** |
| --- | --- | --- |
| Manhattan Bridge | 40.71651 | -73.997004 |
| Williamsburg Bridge | 40.718073 | -73.986059 |
| Broadway & 35th | 40.75069 | -73.98783 |
| Queensboro Bridge | 40.761234 | -73.963886 |
| Cross Bronx Expressway | 40.845167 | -73.906143 |
| Queens College | 40.737107 | -73.821556 |

Figure 1: Selected Real-time PM2.5 Sensor Locations Relative to Congestion Relief Zone (CRZ)


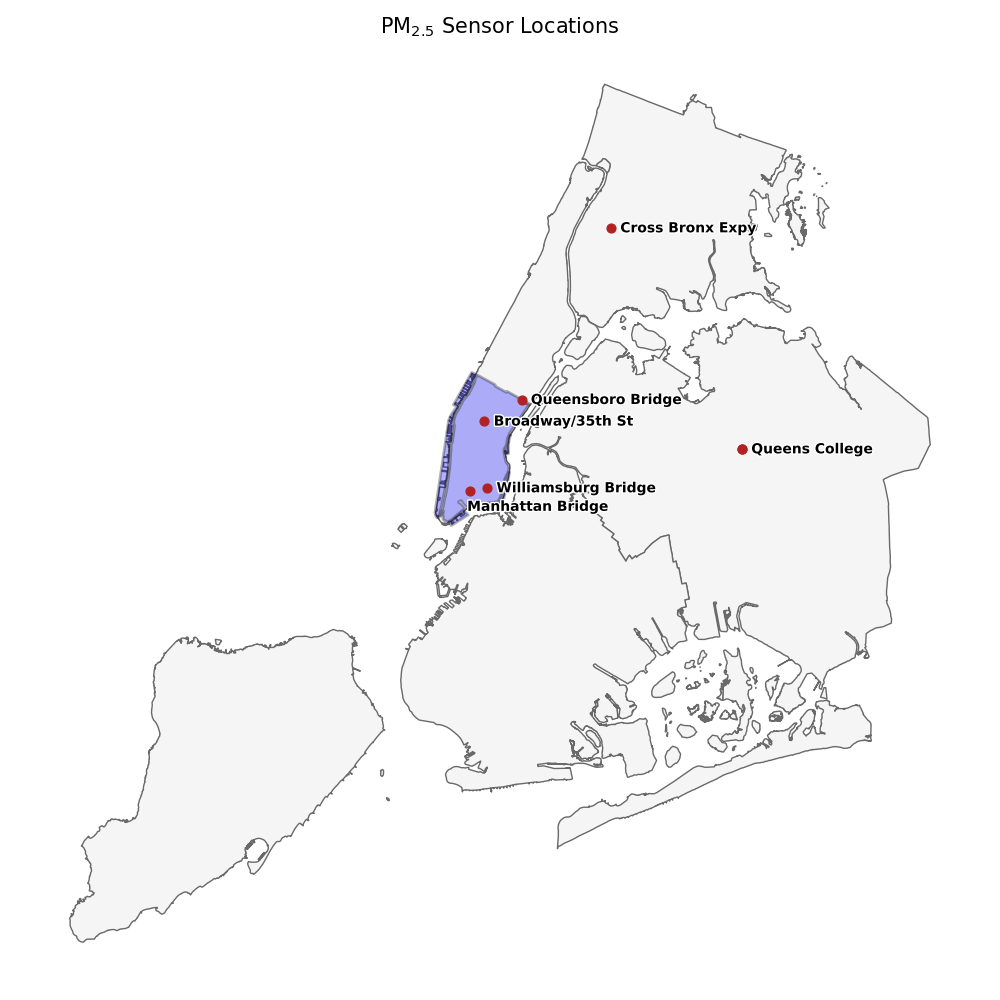

Supplement: Supplementary file 1 [file 5c55d25b13f7a4e07110bd55.docx]
